# Supplementary material
Source: PubMed Central journal article supplement (PMC3457586)
Supplement: IAI.00670-12_zii999099834so1.pdf [file IAI.00670-12_zii999099834so1.pdf]

**Supplemental Table 1. Primers used to identify transcript expression by RT-PCR or qRT-PCR and double stranded (si)RNA sequences**

| <b>Gene name</b>                               | <b>Amplicon Size (RT-PCR)</b>                             | <b>GenBank Accession #</b>              | <b>Primer: Sense 5' → 3'</b> | <b>Primer: Antisense 5' → 3'</b> |
|------------------------------------------------|-----------------------------------------------------------|-----------------------------------------|------------------------------|----------------------------------|
| <i>16S ribosomal RNA gene (E. chaffeensis)</i> | 430 bp                                                    | M73222                                  | GTATTACCGCGGCTGCTGGCAC       | CAATTGCTTATAACCTTTTGGTTATAAAT    |
| <i>rp49 (Drosophila)</i>                       | 165 bp                                                    | U92431                                  | ATCGGTTACGGATCGAACAA         | GACAATCTCCTTGCGCTTCT             |
| <b>Gene name</b>                               | <b>Real Time Probe (qRT-PCR)</b>                          | <b>GenBank Accession #</b>              | <b>Primer: Sense 5' → 3'</b> | <b>Primer: Antisense 5' → 3'</b> |
| <i>rp15a (Drosophila)</i>                      | 5'-56-FAM/TGGGAGGCAAAA TTCTCGGCTTC/36-TAMsp-3'            | NM_136772                               | TGGACCACGAGGAGGCTAGG         | GTTGGTGCATGGTCGGTGA              |
| <i>UCK2 (human)</i>                            | 5'-/56FAM/TAGGTTGCCAG AGTTTCATTAGGCCGCT/3IABkFQ/-3'       | NM_012474.4                             | ACTTGGGCTTGGAGCTGGATACTT     | TGCACAAGGGCAAGAGAGGTCATA         |
| <i>S14 (human)</i>                             | 5'-/56FAM/CCGGGATAG/Z EN/CTGTCCTGTTAGAA TCAGA/3IABkFQ/-3' | NM_00102507 1.1                         | TGGCTGATGAAGAAATTGCTGCCC     | ACGGGACGTCATAACACACCCGATT        |
| <i>HPRT (human)</i>                            | SYBR green detection                                      | NM_000194.2                             | AGATGGTCAAGGTCGCAAGC         | GGACTCCAGATGTTTCCAAACTCAAC       |
| <b>Gene name</b>                               | <b>IDT Catalog ID</b>                                     | <b>Location Region/Exon<sup>1</sup></b> | <b>siRNA Sense 5' → 3'</b>   | <b>siRNA: Antisense 5' → 3'</b>  |
| <i>UCK-2 (human)</i>                           | HSC.RNAL.N012474.12.1                                     | 3'UTR/7                                 | CGUGUAACCAGUUAUAAAUAUAU      | AUAUGUAUUUAUAACUGGUUACACGUU      |
| <i>UCK-2 (human)</i>                           | HSC.RNAL.N012474.12.2                                     | CDS/2                                   | AGCUUCUACCGUGUCCUACCUCGG     | CCGAGGUAAGGACACGGUAGAAGCUAU      |
| <i>UCK-2 (human)</i>                           | HSC.RNAL.N012474.12.3                                     | CDS/4-5                                 | CUCUCACGCAGAGUAUUAAGGGACA    | UGUCCCUUAAUACUCUGCGUGAGAGCC      |
| <i>HPRT1 (human)</i>                           | HPRT-S1 DS Transfection Control                           | NA                                      | GCCAGCUUUGUUGGAUUUGAAAUU     | UUCGGUCUGAAACAACC UAAACUUUAA     |
| Scrambled                                      | NC1 Negative Control Duplex                               | NA                                      | CGUUAUCGCGUAUAAUACGCGUAU     | CAGCAAUAGCGCAUUAUUGCGCAUA        |

<sup>1</sup>Target location in RNA transcript. UTR: Unstranlated region. CDS: Coding sequence. NA: Not applicable.
