# Supplementary material
Source: PubMed Central journal article supplement (PMC3457586)
Supplement: IAI.00670-12_zii999099834so2.pdf [file IAI.00670-12_zii999099834so2.pdf]

**Supplemental Table 2. Stock numbers, genotypes, and associated genes of viable, fertile adult *Drosophila*<sup>1</sup> screened for infection by *E. Chaffeensis*.**

| Stock Number | Stock Genotype                                                                    | Associated Gene                                  | Location of the insertions when created by transposable element insertion                                |
|--------------|-----------------------------------------------------------------------------------|--------------------------------------------------|----------------------------------------------------------------------------------------------------------|
| 1124         | al[1]Gpdh[n1-4]/SM1                                                               | <i>Glycerol 3 phosphate dehydrogenase (gpdh)</i> |                                                                                                          |
| 1125         | al[1]Gpdh[n0]/SM1                                                                 | <i>Glycerol 3 phosphate dehydrogenase (gpdh)</i> |                                                                                                          |
| 2402         | al[1]Gpdh[n5-4]/SM1                                                               | <i>Glycerol 3 phosphate dehydrogenase (gpdh)</i> |                                                                                                          |
| 14560        | y[1] w[67c23]; P{y[+mDint2] w[BR.E.BR]=SUPor-P}CG10672[KG07864]ry[506]            | <i>CG10672</i>                                   |                                                                                                          |
| 18615        | w[1118]; PBac{w[+mC]=WH}CG4743[f03065]                                            | <i>CG4743</i>                                    |                                                                                                          |
| 20231        | y[1] w[67c23]; P{w[+mC] y[+mDint2]=EPgy2}CG6364[EY10942]                          | <i>Uridine kinase 2 (Uck2, CG6364)</i>           | 3R:20,115,939                                                                                            |
| 18540        | w[1118]PBac{w[+mC]=WH}Cht11[f02328]                                               | <i>Chitinase 11 (Cht11, CG3044)</i>              | X:6,742,691                                                                                              |
| 14880        | y[1]; P{y[+mDint2] w[BR.E.BR]=SUPor-P}Map60[KG00506]/SM6a; ry[506]                | <i>microtubule-associated protein 60 (map60)</i> |                                                                                                          |
| 13981        | y[1]; P{y[+mDint2] w[BR.E.BR]=SUPor-P}san[KG04816]/CyO; ry[506]                   | <i>separation anxiety (san)</i>                  | 2R:7,248,253                                                                                             |
| 24723        | w[1118]; Mi{ET1}CG9300[MB04640]                                                   | <i>CG9300</i>                                    |                                                                                                          |
| 15228        | y[1];p{y[+mDint2]w[BR.E.BR]=SUPor-P}CG6479[KG10048]ry[506]<br>NO LONGER AVAILABLE | <i>CG6479</i>                                    | was discontinued since the start of our experiments and our own stock of these flies became ill and died |
| 18141        | PBac{w[+mC]=RB}Tsp3A[e03287] w[1118]                                              | <i>tetraspanin 3A (tsp3A)</i>                    |                                                                                                          |
| 15434        | y[1] w[67c23] P{w[+mC] y[+mDint2]=EPgy2}CG10992[EY03339]                          | <i>CG10992</i>                                   |                                                                                                          |
| 15676        | y[1] w[67c23]; P{w[+mC] y[+mDint2]=EPgy2}Gap69C[EY03771]                          | <i>GTPase-activating protein 69C (gap69C)</i>    |                                                                                                          |
| 20026        | y[1] w[67c23]; P{w[+mC] y[+mDint2]=EPgy2}CG6543[EY08499]                          | <i>Enoyl-coA-hydratase(Echs1, CG6543)</i>        | 2R:9,741,819                                                                                             |
| 25453        | w[1118]; Mi{ET1}CG11875[MB05519]                                                  | <i>Nucleoporin 37 (Nup37;</i>                    |                                                                                                          |

|       |                                                          |                                                                   |               |
|-------|----------------------------------------------------------|-------------------------------------------------------------------|---------------|
|       |                                                          | <i>CG11875</i> )                                                  |               |
| 18466 | w[1118]; PBac{w[+mC]=WH}CG15881[f01739]                  | <i>Coiled-coil domain-containing protein 58 (Ccdc58, CG15881)</i> | 3L:19,798,323 |
| 22326 | y[1] P{w[+mC] y[+mDint2]=EPgy2}CG14806[EY15916] w[67c23] | <i>Apoptogenic 1 (Apop1, CG14806)</i>                             | 3R:21,074,055 |
| 16645 | y[1] w[67c23] P{w[+mC] y[+mDint2]=EPgy2}CG14434[EY05245] | <i>CG14434</i>                                                    | X:6,746,600   |

<sup>1</sup>Obtained from Bloomington Stock Center; Bloomington, IN
