# Supplementary material
Source: PubMed Central journal article supplement (PMC3457586)
Supplement: IAI.00670-12_zii999099834so3.pdf [file IAI.00670-12_zii999099834so3.pdf]

**Supplemental Table 3. Genes exclusively upregulated under permissive growth conditions.**

| <b>Gene Name</b>                    | <b>Fold Change</b> | <b>Description<sup>1</sup></b>                                                                                                                                                       |
|-------------------------------------|--------------------|--------------------------------------------------------------------------------------------------------------------------------------------------------------------------------------|
| Mediator complex subunit 22         | 4.453              | RNA polymerase II transcription mediator activity; regulation of transcription from RNA polymerase II promoter.                                                                      |
| ryan express                        | 3.998              | General RNA polymerase II transcription factor activity; transcription initiation factor activity. transcription initiation from RNA polymerase II promoter                          |
| CG14806                             | 3.859              | Unknown at this time.                                                                                                                                                                |
| mitochondrial ribosomal protein L54 | 3.832              | Structural constituent of ribosome.                                                                                                                                                  |
| CG33276                             | 3.743              | trypsin activity; proteolysis                                                                                                                                                        |
| CG9373                              | 3.7                | mRNA binding; nucleotide binding.                                                                                                                                                    |
| Modifier67.2                        | 3.7                | Protein binding; chromatin binding; RNA polymerase II transcription factor activity; phosphatidate phosphatase activity. regulation of chromatin assembly or disassembly; i          |
| CG9362                              | 3.407              | glutathione transferase activity; maleylacetoacetate isomerase activity; L-phenylalanine catabolic process; tyrosine catabolic process; aromatic amino acid family metabolic process |
| GAGA factor                         | 3.31               | DNA binding; specific RNA polymerase II transcription factor activity; protein binding; RNA polymerase II transcription factor activity; zinc ion binding; nucleic acid binding.     |
| CG14434                             | 3.302              | adenylate cyclase activity; cAMP biosynthetic process                                                                                                                                |
| CG12018                             | 3.19               | DNA-directed DNA polymerase activity; DNA binding; DNA replication                                                                                                                   |
| CDC2 kinase                         | 3.154              | Cyclin-dependent protein kinase activity; protein binding; protein serine/threonine kinase activity; ATP binding.                                                                    |
| CG9596                              | 3.131              | translation initiation factor activity; regulation of translational initiation                                                                                                       |

|                                  |       |                                                                                                                                                                                                                                                                                  |
|----------------------------------|-------|----------------------------------------------------------------------------------------------------------------------------------------------------------------------------------------------------------------------------------------------------------------------------------|
| CG15881                          | 3.12  | Unknown at this time.                                                                                                                                                                                                                                                            |
| CG11858                          | 3.105 | peptidyl-prolyl cis-trans isomerase activity                                                                                                                                                                                                                                     |
| CG9938                           | 3.015 | mitotic metaphase plate congression; chromosome segregation; mitotic spindle organization and biogenesis                                                                                                                                                                         |
| Nckx30C                          | 3.015 | Calcium, potassium:sodium antiporter activity; calcium ion transport; compound eye development.                                                                                                                                                                                  |
| CG11875                          | 3.013 | Unknown at this time.                                                                                                                                                                                                                                                            |
| cinnamon                         | 3.011 | Cysteine-type endopeptidase activity; embryonic development via the syncytial blastoderm; Mo-molybdopterin cofactor biosynthetic process; proteolysis.                                                                                                                           |
| CG30381                          | 2.924 | Unknown at this time.                                                                                                                                                                                                                                                            |
| Centrosome associated protein 60 | 2.885 | Microtubule binding.                                                                                                                                                                                                                                                             |
| CG11555                          | 2.832 | Unknown at this time.                                                                                                                                                                                                                                                            |
| separation anxiety               | 2.831 | N-acetyltransferase activity; fatty acid binding ; mitotic sister chromatid cohesion; metabolic process.                                                                                                                                                                         |
| CG31381                          | 2.829 | tRNA isopentenyltransferase activity; ATP binding; zinc ion binding; tRNA processing                                                                                                                                                                                             |
| CG4730                           | 2.818 | zinc ion binding                                                                                                                                                                                                                                                                 |
| CG32817 /// CG3176               | 2.817 | Unknown at this time.                                                                                                                                                                                                                                                            |
| lethal3Des                       | 2.768 | Biological processes: mRNA cleavage; RNA metabolic process. 47 alleles are reported.                                                                                                                                                                                             |
| CG4627                           | 2.763 | Unknown at this time.                                                                                                                                                                                                                                                            |
| CG31453                          | 2.741 | Its molecular function is described as: ATP binding; nucleoside-triphosphatase activity. The biological processes in which it is involved are not known. 4 alleles are reported. No phenotypic data is available. It has one annotated transcript and one annotated polypeptide. |
| CG14550                          | 2.739 | Unknown at this time.                                                                                                                                                                                                                                                            |
| CG7942                           | 2.732 | RNA lariat debranching enzyme activity; RNA processing; RNA splicing, via transesterification reactions; mRNA processing                                                                                                                                                         |

|                                      |       |                                                                                                                                                                                                                         |
|--------------------------------------|-------|-------------------------------------------------------------------------------------------------------------------------------------------------------------------------------------------------------------------------|
| Translocase of outer membrane 40     | 2.719 | P-P-bond-hydrolysis-driven protein transmembrane transporter activity; transmembrane transporter activity; voltage-gated anion channel activity. It is involved in the biological processes: protein targeting to mitoc |
| CG11980                              | 2.708 | Unknown at this time.                                                                                                                                                                                                   |
| lethal(2)34Df                        | 2.682 | DNA binding; nucleoside-triphosphatase activity; nucleotide binding; DNA-dependent DNA replication; DNA replication initiation; DNA replication; mitotic chromosome condens                                             |
| CG16865                              | 2.666 | Unknown at this time.                                                                                                                                                                                                   |
| mitochondrial ribosomal protein S18A | 2.641 | Structural constituent of ribosome; translation.                                                                                                                                                                        |
| CG4743                               | 2.627 | transmembrane transporter activity; binding. It is involved in the biological process transport                                                                                                                         |
| CG9018                               | 2.623 | Unknown at this time.                                                                                                                                                                                                   |
| CG31229                              | 2.619 | P-P-bond-hydrolysis-driven protein transmembrane transporter activity; protein targeting to mitochondrion                                                                                                               |
| CG7054                               | 2.619 | phosphatidylethanolamine binding                                                                                                                                                                                        |
| CG14440                              | 2.617 | Unknown at this time.                                                                                                                                                                                                   |
| CstF-50                              | 2.608 | Biological process mRNA cleavage.                                                                                                                                                                                       |
| CG8207                               | 2.602 | mannose-1-phosphate guanylyltransferase activity; acyltransferase activity; biosynthetic process                                                                                                                        |
| lethal (2) k14505                    | 2.602 | Unknown at this time                                                                                                                                                                                                    |
| CG11837                              | 2.6   | rRNA (adenine-N6,N6)-dimethyltransferase activity; rRNA modification                                                                                                                                                    |
| frataxin-like                        | 2.593 | Biological process cellular iron ion homeostasis                                                                                                                                                                        |
| CG10222                              | 2.585 | nucleotide binding                                                                                                                                                                                                      |
| CG8366                               | 2.58  | DNA binding; nuclease activity; magnesium ion binding                                                                                                                                                                   |
| COQ7                                 | 2.579 | Oxidoreductase activity; transition metal ion binding ; ubiquinone metabolic process; protein metabolic process; ubiquinone biosynthetic process.                                                                       |

|                                      |       |                                                                                                                                                                                                                      |
|--------------------------------------|-------|----------------------------------------------------------------------------------------------------------------------------------------------------------------------------------------------------------------------|
| Batman                               | 2.578 | Specific RNA polymerase II transcription factor activity; protein binding. It is involved in the biological processes: regulation of transcription from RNA polymerase II promoter; chromatin silencing.             |
| CG14270                              | 2.565 | Unknown at this time.                                                                                                                                                                                                |
| CG14803                              | 2.545 | Unknown at this time.                                                                                                                                                                                                |
| CG3709                               | 2.538 | Unknown at this time.                                                                                                                                                                                                |
| CG7747                               | 2.532 | peptidyl-prolyl cis-trans isomerase activity                                                                                                                                                                         |
| CG11170                              | 2.519 | ATP binding; ATPase activity                                                                                                                                                                                         |
| CG3542                               | 2.518 | FH1 domain binding; nuclear mRNA splicing, via spliceosome                                                                                                                                                           |
| zero population growth               | 2.516 | Gap junction channel activity; germ cell development.                                                                                                                                                                |
| CG4951                               | 2.51  | Unknown at this time.                                                                                                                                                                                                |
| Mtr3                                 | 2.506 | 3'-5'-exoribonuclease activity; RNA binding; RNA processing. One allele is reported.                                                                                                                                 |
| CG6388                               | 2.49  | tRNA (guanine-N2-)-methyltransferase activity; RNA binding; tRNA modification                                                                                                                                        |
| CG6637                               | 2.479 | Unknown at this time.                                                                                                                                                                                                |
| semiphorin                           | 2.478 |                                                                                                                                                                                                                      |
| CG10473                              | 2.471 | nucleotide binding; apoptosis; protein targeting to lysosome. 22 alleles are reported. The phenotype of these alleles is annotated with melanotic mass. It has 2 annotated transcripts and 2 annotated polypeptides. |
| CG17286                              | 2.468 | mitotic spindle organization and biogenesis                                                                                                                                                                          |
| CG14781                              | 2.458 | mitotic spindle elongation                                                                                                                                                                                           |
| Origin recognition complex subunit 4 | 2.452 | Nucleoside-triphosphatase activity; nucleotide binding; DNA replication initiation.                                                                                                                                  |
| CG32736                              | 2.445 | Unknown at this time.                                                                                                                                                                                                |
| altered disjunction                  | 2.443 | Protein kinase activity; protein serine/threonine kinase activity; ATP binding; mitotic centrosome separation; mitotic cell cycle; protein amino acid phosphorylation; mito                                          |
| CG14544                              | 2.431 | Unknown at this time.                                                                                                                                                                                                |

|                                     |       |                                                                                                                               |
|-------------------------------------|-------|-------------------------------------------------------------------------------------------------------------------------------|
| CG10932                             | 2.43  | acetyl-CoA C-acetyltransferase activity; fatty acid biosynthetic process; pyruvate metabolic process                          |
| CG6543                              | 2.429 | enoyl-CoA hydratase activity; fatty acid beta-oxidation                                                                       |
| CG3587                              | 2.425 | Unknown at this time.                                                                                                         |
| CG14749                             | 2.418 | poly(A)+ mRNA export from nucleus                                                                                             |
| Rad1                                | 2.417 | Damaged DNA binding; exonuclease activity; exodeoxyribonuclease III activity; DNA repair                                      |
| CG8378                              | 2.411 | zinc ion binding                                                                                                              |
| CG2656                              | 2.402 | purine nucleotide binding                                                                                                     |
| CG3402                              | 2.399 | protein binding                                                                                                               |
| CG11103                             | 2.398 | Unknown at this time.                                                                                                         |
| CG32554                             | 2.391 | Unknown at this time.                                                                                                         |
| CG33340                             | 2.391 | Unknown at this time.                                                                                                         |
| tex                                 | 2.389 | Unknown at this time                                                                                                          |
| CG12343                             | 2.386 | RNA splicing factor activity, transesterification mechanism                                                                   |
| lethal (3) 01239                    | 2.374 | chaperone binding; unfolded protein binding; 'de novo' protein folding; phagocytosis, engulfment; oogenesis; protein folding  |
| CG2685                              | 2.364 | Unknown at this time.                                                                                                         |
| RfC3                                | 2.364 | DNA binding; ATP binding; DNA clamp loader activity; DNA replication.                                                         |
| mitochondrial ribosomal protein L11 | 2.36  | structural constituent of ribosome; translation.                                                                              |
| CG8159                              | 2.352 | zinc ion binding; nucleic acid binding                                                                                        |
| Xeroderma pigmentosum group A-like  | 2.348 | Damaged DNA binding; nucleotide binding. Nucleotide-excision repair.                                                          |
| CG9754                              | 2.345 | Unknown at this time.                                                                                                         |
| Mapmodulin                          | 2.345 | Microtubule binding; phosphatase inhibitor activity; protein binding; microtubule-based process; nucleocytoplasmic transport. |
| RNA polymerase III                  | 2.336 | DNA-directed RNA polymerase activity; DNA binding; RNA polymerase III promoter.                                               |
| lethal (1) G0020                    | 2.332 | N-acetyltransferase activity.                                                                                                 |
| CG1134                              | 2.328 | protein binding; zinc ion binding                                                                                             |
| CG7172                              | 2.328 | Unknown at this time.                                                                                                         |
| CG5285                              | 2.323 | single-strand selective uracil DNA N-glycosylase activity                                                                     |

|                               |       |                                                                                                                                                                              |
|-------------------------------|-------|------------------------------------------------------------------------------------------------------------------------------------------------------------------------------|
| CG6294                        | 2.314 | metallopeptidase activity; zinc ion binding; proteolysis                                                                                                                     |
| CG6833                        | 2.314 | exonuclease activity; nucleic acid binding.                                                                                                                                  |
| DNA polymerase gamma          | 2.309 | DNA-directed DNA polymerase activity; ATP binding; glycine-tRNA ligase activity; mitochondrial genome maintenance; mitochondrion organization and biogenesis; DNA-dependent  |
| CG11722                       | 2.302 | Unknown at this time.                                                                                                                                                        |
| CG9300                        | 2.299 | transporter activity; transport                                                                                                                                              |
| CG34125                       | 2.292 | Unknown at this time.                                                                                                                                                        |
| CG2614                        | 2.291 | ATP binding; methyltransferase activity; metabolic process                                                                                                                   |
| lethal(3)88Ab                 | 2.289 | DNA binding ;DNA-dependent DNA replication; DNA replication initiation; DNA replication; eggshell chorion gene amplification; mitotic chromosome condensation; mitotic spind |
| CG3625                        | 2.282 | Unknown at this time.                                                                                                                                                        |
| CG5585                        | 2.271 | Unknown at this time.                                                                                                                                                        |
| thoc6                         | 2.271 | mRNA export from nucleus.                                                                                                                                                    |
| tRNA-guanine transglycosylase | 2.265 | Queuine tRNA-ribosyltransferase activity; queuosine biosynthetic process.                                                                                                    |
| CG9867                        | 2.257 | Unknown at this time.                                                                                                                                                        |
| gluon                         | 2.255 | DNA binding; nucleotide binding; ATP binding; protein binding; ATPase activity; mitotic chromosome condensation; mitosis; mitotic sister chromatid segregation               |
| CG32721                       | 2.254 | mRNA binding; negative regulation of transcription from RNA polymerase II promoter, mitotic                                                                                  |
| CG10672                       | 2.252 | oxidoreductase activity, acting on CH-OH group of donors; binding; metabolic process                                                                                         |
| CG31278                       | 2.242 | peptide deformylase activity; iron ion binding; translation                                                                                                                  |
| kappaB-Ras                    | 2.232 | GTP binding; protein binding; negative regulation of I-kappaB kinase/NF-kappaB cascade; small GTPase mediated signal transduction.                                           |
| lethal (3) S147910            | 2.229 | Unknown at this time                                                                                                                                                         |

|                                  |       |                                                                                                                                                                             |
|----------------------------------|-------|-----------------------------------------------------------------------------------------------------------------------------------------------------------------------------|
| actin-related protein            | 2.228 |                                                                                                                                                                             |
| CG31917                          | 2.228 | Unknown at this time.                                                                                                                                                       |
| ecdysoneless                     | 2.217 | 13 unique terms, many of which group under: anatomical structure development; embryonic development via the syncytial blastoderm;                                           |
| Translocase of outer membrane 70 | 2.216 | P-P-bond-hydrolysis-driven protein transmembrane transporter activity; transmembrane transporter activity; protein targeting to mitochondrion.                              |
| CG11788                          | 2.208 | Unknown at this time.                                                                                                                                                       |
| HP1b                             | 2.206 | Chromatin binding; chromatin assembly or disassembly.                                                                                                                       |
| CG32320                          | 2.197 | Unknown at this time.                                                                                                                                                       |
| CG8435                           | 2.195 | Unknown at this time.                                                                                                                                                       |
| NF-YC-like                       | 2.194 |                                                                                                                                                                             |
| casein kinase 2                  | 2.191 |                                                                                                                                                                             |
| CG2100                           | 2.19  | polynucleotide adenylyltransferase activity; RNA binding; RNA processing                                                                                                    |
| CG34039                          | 2.184 | Unknown at this time.                                                                                                                                                       |
| Sirt6                            | 2.184 | NAD-dependent histone deacetylase activity; DNA binding; NAD binding; zinc ion binding; chromatin silencing; protein amino acid deacetylation.                              |
| CG32736                          | 2.18  | Unknown at this time.                                                                                                                                                       |
| CG2931                           | 2.177 | mRNA binding; nucleic acid binding; nucleotide binding                                                                                                                      |
| CG11808                          | 2.176 | Unknown at this time.                                                                                                                                                       |
| DNA polymerase 180K              | 2.175 |                                                                                                                                                                             |
| CG9951 /// GA22148               | 2.174 | Unknown at this time.                                                                                                                                                       |
| ORMDL                            | 2.174 | Unknown at this time                                                                                                                                                        |
| CG13142                          | 2.171 | Unknown at this time.                                                                                                                                                       |
| Use1                             | 2.171 | Golgi organization and biogenesis.                                                                                                                                          |
| CG7772                           | 2.168 | carbonate dehydratase activity; zinc ion binding; carbon utilization                                                                                                        |
| CG11125                          | 2.166 | Unknown at this time.                                                                                                                                                       |
| 5' gene                          | 2.161 | Glycerol-3-phosphate dehydrogenase (NAD+) activity; NAD binding; glycerol-3-phosphate metabolic process; flight behavior; triacylglycerol metabolic process; glycerophospha |
| CG5188                           | 2.16  | methionyl aminopeptidase activity; proteolysis                                                                                                                              |

|                                      |       |                                                                                                                                                                            |
|--------------------------------------|-------|----------------------------------------------------------------------------------------------------------------------------------------------------------------------------|
| CG6364                               | 2.158 | uridine kinase activity; ATP binding; phosphotransferase activity, alcohol group as acceptor; phagocytosis, engulfment; metabolic process                                  |
| CG10584                              | 2.157 | Unknown at this time.                                                                                                                                                      |
| CG15027                              | 2.154 | Unknown at this time.                                                                                                                                                      |
| CG5451                               | 2.154 | Unknown at this time.                                                                                                                                                      |
| CG6479                               | 2.154 | phagocytosis, engulfment                                                                                                                                                   |
| fragment H                           | 2.149 | Carboxylesterase activity.                                                                                                                                                 |
| ECSIT                                | 2.147 | Protein binding; innate immune response; Toll signaling pathway; defense response; signal transduction                                                                     |
| CG11920                              | 2.144 | Unknown at this time.                                                                                                                                                      |
| CG11679                              | 2.142 | Unknown at this time.                                                                                                                                                      |
| CG12765                              | 2.14  | Unknown at this time.                                                                                                                                                      |
| CG6712                               | 2.139 | RNA binding                                                                                                                                                                |
| CG17665                              | 2.137 | Unknown at this time.                                                                                                                                                      |
| mitochondrial ribosomal protein S2   | 2.135 | Structural constituent of ribosome; translation                                                                                                                            |
| CG7845                               | 2.132 | Unknown at this time.                                                                                                                                                      |
| CG15653                              | 2.127 | Unknown at this time.                                                                                                                                                      |
| CG6812                               | 2.124 | cation transmembrane transporter activity; sequence-specific DNA binding; cation transport                                                                                 |
| Origin recognition complex subunit 1 | 2.122 | DNA binding; ATP binding; nucleoside-triphosphatase activity; DNA-dependent DNA replication; DNA replication initiation; chromatin silencing                               |
| Wsck                                 | 2.122 | Protein-tyrosine kinase activity; ATP binding' protein amino acid phosphorylation.                                                                                         |
| Odorant receptor 67b                 | 2.117 | Olfactory receptor activity; odorant binding; Sensory perception of smell; detection of chemical stimulus involved in sensory perception of smell                          |
| mitochondrial ribosomal protein S31  | 2.115 | Structural constituent of ribosome; Translation                                                                                                                            |
| CG31873                              | 2.113 | diacylglycerol kinase activity; activation of protein kinase C activity                                                                                                    |
| snf5-related 1                       | 2.112 | RNA polymerase II transcription factor activity; transcription coactivator activity; general RNA polymerase II transcription factor activity; regulation of transcription; |



|                                                |       |                                                                                                                                                                         |
|------------------------------------------------|-------|-------------------------------------------------------------------------------------------------------------------------------------------------------------------------|
| SMC2                                           | 2.111 | DNA binding; ATP binding; protein binding; ATPase activity; Sister chromatid cohesion; mitotic spindle organization and biogenesis; mitotic chromosome condensation;    |
| CG3044                                         | 2.109 | chitinase activity; cation binding; chitin catabolic process                                                                                                            |
| Lobe                                           | 2.103 | Negative regulation of programmed cell death; eye-antennal disc development; negative regulation of Wnt receptor signaling pathway; compound eye development            |
| mitochondrial transcription termination factor | 2.102 | Transcription termination factor activity; DNA binding; Termination of mitochondrial transcription                                                                      |
| CG17230                                        | 2.101 | Unknown at this time.                                                                                                                                                   |
| septin                                         | 2.099 |                                                                                                                                                                         |
| germline transcription factor                  | 2.093 | DNA binding; ATP binding; DNA clamp loader activity; DNA replication                                                                                                    |
| gamma-tubulin ring protein 84                  | 2.092 | Microtubule binding; gamma-tubulin binding; tubulin binding; microtubule minus-end binding; microtubule nucleation; microtubule-based process; regulation of cell cycle |
| CG12935                                        | 2.086 | Unknown at this time.                                                                                                                                                   |
| modifier of rudimentary                        | 2.083 | Unknown at this time                                                                                                                                                    |
| CG7853                                         | 2.082 | 3'-phosphoadenosine 5'-phosphosulfate transmembrane transporter activity                                                                                                |
| CG7338                                         | 2.078 | ribosome biogenesis and assembly                                                                                                                                        |
| CG12854                                        | 2.076 | Unknown at this time.                                                                                                                                                   |
| MrgBP                                          | 2.07  | DNA binding; Transcription.                                                                                                                                             |
| CG8067                                         | 2.062 | methyltransferase activity; metabolic process                                                                                                                           |
| CG2709                                         | 2.061 | protein binding; zinc ion binding                                                                                                                                       |
| CG18428                                        | 2.06  | Unknown at this time.                                                                                                                                                   |
| Serine/arginine rich protein 55                | 2.06  | l-mRNA binding; RNA splicing factor activity, transesterification mechanism; protein binding; nucleotide binding. Nuclear mRNA splicing, via spliceosome                |
| CG8939                                         | 2.059 | rRNA methyltransferase activity; rRNA processing                                                                                                                        |
| interference Hedgehog                          | 2.052 | Heparin binding; protein homodimerization activity; protein binding; hedgehog receptor activity;                                                                        |

|                                    |       |                                                                                                                                                                                                                                                                   |
|------------------------------------|-------|-------------------------------------------------------------------------------------------------------------------------------------------------------------------------------------------------------------------------------------------------------------------|
|                                    |       | smoothened signaling pathway;<br>positive regulation of smoothened<br>signaling                                                                                                                                                                                   |
| phenoloxidase                      | 2.052 |                                                                                                                                                                                                                                                                   |
| CG5705                             | 2.051 | translation release factor activity,<br>codon specific; translational<br>termination                                                                                                                                                                              |
| Transport and Golgi organization 4 | 2.05  | Golgi organization and biogenesis.                                                                                                                                                                                                                                |
| CG11820                            | 2.047 | protein binding.                                                                                                                                                                                                                                                  |
| presenilin enhancer                | 2.047 | Endopeptidase activity                                                                                                                                                                                                                                            |
| Smc5                               | 2.047 | ATP binding; mitosis; mitotic sister<br>chromatid segregation; DNA<br>metabolic process                                                                                                                                                                           |
| CG13850                            | 2.044 | ATP binding; protein kinase activity;<br>apoptosis                                                                                                                                                                                                                |
| CG32250                            | 2.043 | transporter activity; transmembrane<br>transporter activity; binding;<br>transport                                                                                                                                                                                |
| CG11035                            | 2.041 | chaperone binding; unfolded<br>protein binding; heat shock protein<br>binding; response to heat; protein<br>folding                                                                                                                                               |
| CG2611                             | 2.038 | Unknown at this time.                                                                                                                                                                                                                                             |
| Brd8                               | 2.034 | Unknown at this time                                                                                                                                                                                                                                              |
| CG10265                            | 2.032 | Unknown at this time.                                                                                                                                                                                                                                             |
| CG6204                             | 2.032 | Unknown at this time.                                                                                                                                                                                                                                             |
| CG33213                            | 2.028 | nucleic acid binding; zinc ion binding                                                                                                                                                                                                                            |
| CG12942                            | 2.027 | zinc ion binding                                                                                                                                                                                                                                                  |
| CG6444                             | 2.027 | Unknown at this time.                                                                                                                                                                                                                                             |
| CG8060                             | 2.027 | protein binding                                                                                                                                                                                                                                                   |
| CG3732                             | 2.023 | zinc ion binding                                                                                                                                                                                                                                                  |
| CG7878                             | 2.012 | helicase activity; ATP-dependent<br>RNA helicase activity; ATP binding;<br>RNA binding.                                                                                                                                                                           |
| CG31120                            | 2.011 | oxidoreductase activity, acting on<br>paired donors, with incorporation or<br>reduction of molecular oxygen, 2-<br>oxoglutarate as one donor, and<br>incorporation of one atom each of<br>oxygen into both donors; iron ion<br>binding; protein metabolic process |
| CG3639                             | 2.01  | protein binding; zinc ion binding;<br>peroxisome organization and<br>biogenesis; protein targeting to<br>peroxisome                                                                                                                                               |
| CG32786 /// CG32783 /// CG2941     | 2.008 | Unknown at this time.                                                                                                                                                                                                                                             |

|                                                                |       |                                                                                                                                                                             |
|----------------------------------------------------------------|-------|-----------------------------------------------------------------------------------------------------------------------------------------------------------------------------|
| 5' gene                                                        | 2.005 | Glycerol-3-phosphate dehydrogenase (NAD+) activity; NAD binding; glycerol-3-phosphate metabolic process; flight behavior; triacylglycerol metabolic process; glycerophospha |
| CG17508                                                        | 2.004 | Unknown at this time.                                                                                                                                                       |
| CG13919                                                        | 2.001 | Unknown at this time.                                                                                                                                                       |
| Tetraspanin 3A                                                 | 2.001 | Phagocytosis, engulfment                                                                                                                                                    |
| p47                                                            | 1.999 | nuclear envelope reassembly; rhabdomere development.                                                                                                                        |
| CG30094                                                        | 1.996 | zinc ion binding                                                                                                                                                            |
| mitochondrial ribosomal protein L13                            | 1.995 | Structural constituent of ribosome. Translation                                                                                                                             |
| Alpha 3 glucosyltransferase                                    | 1.991 | Oligosaccharyl transferase activity; glucosyltransferase activity; protein amino acid N-linked glycosylation                                                                |
| CG14777                                                        | 1.991 | Unknown at this time.                                                                                                                                                       |
| scaf6                                                          | 1.991 | mRNA binding; nuclear mRNA splicing, via spliceosom                                                                                                                         |
| Elongation factor Tu mitochondrial                             | 1.99  | Translation elongation factor activity; GTP binding; GTPase activity.                                                                                                       |
| CG8828                                                         | 1.987 | protein binding; mitotic spindle organization and biogenesis; regulation of mitosis; vesicle-mediated transport                                                             |
| CG7842                                                         | 1.986 | [acyl-carrier-protein] S-malonyltransferase activity; binding; fatty acid biosynthetic process                                                                              |
| CG10107                                                        | 1.985 | cysteine-type peptidase activity; proteolysis                                                                                                                               |
| CG5104                                                         | 1.982 | Unknown at this time.                                                                                                                                                       |
| cyclin A                                                       | 1.981 | Cyclin-dependent protein kinase regulator activity; regulation of mitosis; peripheral nervous system development; mitosis; mitotic sister chromatid segregation             |
| CG13339                                                        | 1.974 | Unknown at this time.                                                                                                                                                       |
| CG7705                                                         | 1.974 | Unknown at this time.                                                                                                                                                       |
| anon-fast-evolving-1A3                                         | 1.973 | Unknown at this time                                                                                                                                                        |
| Drosophila cleavage and polyadenylation stimulation factor-160 | 1.973 | Protein binding; mRNA 3'-UTR binding; mRNA binding; mRNA cleavage; mRNA polyadenylation.                                                                                    |
| CG5846                                                         | 1.97  | Unknown at this time.                                                                                                                                                       |
| CG32772                                                        | 1.965 | nucleic acid binding; zinc ion binding                                                                                                                                      |

|                                    |       |                                                                                                                                                                              |
|------------------------------------|-------|------------------------------------------------------------------------------------------------------------------------------------------------------------------------------|
| male sterile(2)46C                 | 1.965 | Small conjugating protein ligase activity; spermatid development; sperm individualization; regulation of protein metabolic process; post-translational protein modification. |
| CG2453                             | 1.962 | 2-polyprenyl-6-methoxy-1,4-benzoquinone methyltransferase activity                                                                                                           |
| CG4685                             | 1.962 | succinate-semialdehyde dehydrogenase activity; gamma-aminobutyric acid catabolic process                                                                                     |
| anon-fast-evolving-2D12            | 1.961 | Unknown at this time                                                                                                                                                         |
| CG12056                            | 1.961 | transition metal ion binding; heme binding                                                                                                                                   |
| Ucp4A                              | 1.96  | Oxidative phosphorylation uncoupler activity; transmembrane transporter activity; binding; proton transport; mitochondrial transport.                                        |
| CG3335                             | 1.955 | helicase activity; mRNA binding; nucleic acid binding; nucleotide binding                                                                                                    |
| CG2875                             | 1.953 | Unknown at this time.                                                                                                                                                        |
| CG12022                            | 1.948 | Unknown at this time.                                                                                                                                                        |
| MAGE                               | 1.947 | Unknown at this time                                                                                                                                                         |
| CG13742                            | 1.945 | Unknown at this time.                                                                                                                                                        |
| CG1662                             | 1.944 | Unknown at this time.                                                                                                                                                        |
| yolky                              | 1.943 | Binding; nuclear mRNA splicing, via spliceosome; Malpighian tubule morphogenesis; central nervous system development; neuroblast proliferation                               |
| CG13197                            | 1.941 | protein tyrosine/serine/threonine phosphatase activity; protein tyrosine phosphatase activity; protein amino acid dephosphorylation                                          |
| CG32495 /// Glutathione Synthetase | 1.941 | glutathione synthase activity; ATP binding; biosynthetic process                                                                                                             |
| CG10688                            | 1.94  | phosphomannomutase activity; GDP-mannose biosynthetic process; mannose biosynthetic process                                                                                  |
| CG10648                            | 1.938 | mitotic spindle elongation                                                                                                                                                   |
| CG1636                             | 1.937 | Unknown at this time.                                                                                                                                                        |

|                      |       |                                                                                                                                                                                                       |
|----------------------|-------|-------------------------------------------------------------------------------------------------------------------------------------------------------------------------------------------------------|
| CG9597               | 1.937 | sequence-specific DNA binding; DNA binding; bent DNA binding; protein-DNA complex assembly; snRNA transcription from RNA polymerase II promoter; snRNA transcription from RNA polymerase III promoter |
| CG6961 /// CG18259   | 1.936 | mRNA binding; nucleic acid binding; nucleotide binding                                                                                                                                                |
| CG32576              | 1.935 | vesicle-mediated transport                                                                                                                                                                            |
| Ranbp16              | 1.934 | Ran GTPase binding; nuclear export signal receptor activity; protein transporter activity; binding; protein export from nucleus; protein import into nucleus, docking                                 |
| CG11063              | 1.932 | ligand-dependent nuclear receptor binding; thyroid hormone receptor binding; actin binding; zinc ion binding                                                                                          |
| CG32174              | 1.931 | ubiquinone biosynthetic process                                                                                                                                                                       |
| KH-domain            | 1.928 |                                                                                                                                                                                                       |
| CG5924               | 1.926 | DNA helicase activity; ATP binding; mitochondrial genome maintenance; protein homooligomerization; DNA replication                                                                                    |
| CG6726               | 1.925 | aminoacylase activity; metallopeptidase activity; protein dimerization activity; amino acid metabolic process; proteolysis                                                                            |
| Hexosaminidase 1     | 1.925 | Beta-N-acetylhexosaminidase activity; beta-N-acetylglucosaminidase activity; cation binding. Carbohydrate metabolic process                                                                           |
| CG30096              | 1.922 | Unknown at this time.                                                                                                                                                                                 |
| Lethal hybrid rescue | 1.919 | DNA binding                                                                                                                                                                                           |
| CG11927              | 1.917 | Unknown at this time.                                                                                                                                                                                 |
| CG7639               | 1.917 | Unknown at this time.                                                                                                                                                                                 |
| CG16890              | 1.908 | Unknown at this time.                                                                                                                                                                                 |
| CG5199               | 1.908 | Unknown at this time.                                                                                                                                                                                 |
| CG33090              | 1.906 | beta-glucosidase activity; coenzyme binding; hydroxymethylglutaryl-CoA reductase (NADPH) activity; bile acid metabolic process; O-glycoside catabolic process; coenzyme A metabolic process           |

|                                     |       |                                                                                                                                                                             |
|-------------------------------------|-------|-----------------------------------------------------------------------------------------------------------------------------------------------------------------------------|
| Ski-interacting protein             | 1.902 | Embryonic development via the syncytial blastoderm; eye-antennal disc development                                                                                           |
| CG10495                             | 1.898 | FAD binding; tRNA dihydrouridine synthase activity; tRNA processing                                                                                                         |
| CG12006                             | 1.898 | mannosyltransferase activity. GPI anchor biosynthetic process                                                                                                               |
| CG1265                              | 1.897 | Unknown at this time.                                                                                                                                                       |
| CG7282                              | 1.896 |                                                                                                                                                                             |
| CG7379                              | 1.896 | zinc ion binding; protein binding                                                                                                                                           |
| Nobody                              | 1.893 | Endopeptidase activity; proteolysis; regulation of exit from mitosis. 4 alleles are reported                                                                                |
| CG3011                              | 1.891 | glycine hydroxymethyltransferase activity; pyridoxal phosphate binding; L-serine biosynthetic process; glycine metabolic process                                            |
| Negative elongation factor E        | 1.89  | mRNA binding; nucleotide binding; negative regulation of transcription from RNA polymerase II promoter, mitotic. 4 alleles are reported                                     |
| CG2972                              | 1.888 | Unknown at this time.                                                                                                                                                       |
| Stromalin                           | 1.888 | Binding                                                                                                                                                                     |
| CG17556 /// CG3678                  | 1.885 | binding                                                                                                                                                                     |
| CG32022                             | 1.883 | Unknown at this time.                                                                                                                                                       |
| mitochondrial ribosomal protein S22 | 1.88  | Structural constituent of ribosome; Translation                                                                                                                             |
| vismay                              | 1.88  | Histone deacetylase binding; transcription corepressor activity; transcription factor activity; sequence-specific DNA binding' spermatogenesis; regulation of transcription |
| CG32344                             | 1.877 | helicase activity; ATP-dependent RNA helicase activity; ATP binding; RNA binding                                                                                            |
| Bicoid interacting protein 4        | 1.876 | Pprotein serine/threonine kinase activity; ATP binding; protein amino acid phosphorylation.                                                                                 |
| CG11006                             | 1.876 | mitotic spindle organization and biogenesis                                                                                                                                 |
| armitage                            | 1.875 | DNA helicase activity; embryonic axis specification; mRNA catabolic process, nonsense-mediated decay; negative regulation of oskar mRNA translation                         |

|                                            |       |                                                                                                                                                                    |
|--------------------------------------------|-------|--------------------------------------------------------------------------------------------------------------------------------------------------------------------|
| Proteasome 26S regulatory subunit 6A       | 1.875 | Endopeptidase activity; ATPase activity; ATP binding; ATP-dependent peptidase activity; serine-type endopeptidase activity. Proteolysis; cellular process          |
| CG1970                                     | 1.874 | NADH dehydrogenase (ubiquinone) activity; NADH dehydrogenase activity; NAD binding; electron donor activity. mitochondrial electron transport, NADH to ubiquinone. |
| CG3911                                     | 1.874 | Unknown at this time.                                                                                                                                              |
| CG2617                                     | 1.873 | protein binding; zinc ion binding; oxidoreductase activity; metabolic process                                                                                      |
| CG11030                                    | 1.871 | Unknown at this time.                                                                                                                                              |
| Plum                                       | 1.871 | ATPase activity, coupled to transmembrane movement of substances; eye pigment precursor transporter activity; ATP binding; ommochrome biosynthetic process         |
| Nuclear inhibitor of Protein phosphatase 1 | 1.87  | Protein phosphatase inhibitor activity; mRNA binding; type 1 serine/threonine specific protein phosphatase inhibitor activity                                      |
| rev7                                       | 1.87  | Positive regulation of lyase activity; mitosis. 3 alleles are reported. No phenotypic data is available                                                            |
| Rpt4                                       | 1.869 | ATPase activity; endopeptidase activity; ATP binding. Iproteolysis; protein catabolic process                                                                      |
| CG11576                                    | 1.867 | Unknown at this time.                                                                                                                                              |
| CG6697                                     | 1.867 | Unknown at this time.                                                                                                                                              |
| GTPase-activating protein 69C              | 1.867 | GTP binding; ARF GTPase activator activity; zinc ion binding; ARF GTPase activity.                                                                                 |
| dynein-related heavy chain polypeptide     | 1.866 |                                                                                                                                                                    |
| CG11123                                    | 1.865 | RNA binding                                                                                                                                                        |
| CG2116                                     | 1.865 | zinc ion binding                                                                                                                                                   |
| CG12237                                    | 1.863 | phosphoric monoester hydrolase activity; metabolic process                                                                                                         |
| CG14722                                    | 1.863 | apoptotic protease activator activity                                                                                                                              |
| dynactin, p27 subunit /// CG17347          | 1.863 | Acyltransferase activity; Microtubule-based movement.                                                                                                              |
| CG9346                                     | 1.856 | mRNA binding; RNA binding; nucleotide binding; RNA processing                                                                                                      |
| CG8616                                     | 1.853 | Unknown at this time.                                                                                                                                              |

|                                           |       |                                                                                                                                                            |
|-------------------------------------------|-------|------------------------------------------------------------------------------------------------------------------------------------------------------------|
| methyltransferase-like                    | 1.853 | S-adenosylmethionine-dependent methyltransferase activity                                                                                                  |
| CG13392                                   | 1.851 | Unknown at this time.                                                                                                                                      |
| almondex                                  | 1.849 | Binding; ectoderm development; mesoderm development                                                                                                        |
| Lysyl-tRNA synthetase                     | 1.849 | Lysine-tRNA ligase activity; ATP binding; nucleic acid binding; lysyl-tRNA aminoacylation.                                                                 |
| CG33635                                   | 1.848 | protein binding; Golgi to endosome transport                                                                                                               |
| CG31301                                   | 1.847 | described as nucleic acid binding                                                                                                                          |
| CG7828                                    | 1.847 | ubiquitin activating enzyme activity; binding; metabolic process                                                                                           |
| CG3776                                    | 1.846 | protein binding                                                                                                                                            |
| toys are us                               | 1.845 | Unknown at this time                                                                                                                                       |
| CG4925                                    | 1.839 | signal transducer activity                                                                                                                                 |
| CG6607                                    | 1.839 | Unknown at this time.                                                                                                                                      |
| Prolyl-tRNA synthetase                    | 1.839 | Proline-tRNA ligase activity; ATP binding; glycine-tRNA ligase activity; prolyl-tRNA aminoacylation; glycyl-tRNA aminoacylation                            |
| CG6299                                    | 1.838 | glycolipid transporter activity; glycolipid binding.; glycolipid transport                                                                                 |
| Nipsnap                                   | 1.836 | Unknown at this time                                                                                                                                       |
| CG12360                                   | 1.835 | Unknown at this time.                                                                                                                                      |
| CG18292                                   | 1.835 | Unknown at this time.                                                                                                                                      |
| CG32649                                   | 1.833 | protein kinase activity; mitochondrial electron transport, ubiquinol to cytochrome c                                                                       |
| CG4159                                    | 1.833 | pseudouridylate synthase activity; tRNA binding; tRNA-pseudouridine synthase activity; pseudouridine synthesis; tRNA processing                            |
| mutagen-sensitive 322                     | 1.833 | DNA repair                                                                                                                                                 |
| CG4291                                    | 1.832 | FH1 domain binding; zinc ion binding; nucleic acid binding; nuclear mRNA splicing, via spliceosome                                                         |
| Signal recognition particle receptor beta | 1.832 | Signal recognition particle binding; GTPase activity; SRP-dependent cotranslational protein targeting to membrane; larval chitin-based cuticle development |
| CG8300                                    | 1.831 | Unknown at this time.                                                                                                                                      |
| lethal (1) G0255                          | 1.831 | Fumarate hydratase activity; tricarboxylic acid cycle; fumarate                                                                                            |



|                                                         |       |                                                                                                                                                                            |
|---------------------------------------------------------|-------|----------------------------------------------------------------------------------------------------------------------------------------------------------------------------|
|                                                         |       | metabolic process                                                                                                                                                          |
| Aly                                                     | 1.83  | Transcription coactivator activity; mRNA binding; nucleic acid binding; nucleotide binding                                                                                 |
| CG7429                                                  | 1.827 | Unknown at this time.                                                                                                                                                      |
| CG5180                                                  | 1.826 | Unknown at this time.                                                                                                                                                      |
| CG16903                                                 | 1.825 | cyclin-dependent protein kinase regulator activity; general RNA polymerase II transcription factor activity                                                                |
| CG8223                                                  | 1.825 | Unknown at this time.                                                                                                                                                      |
| CG14290                                                 | 1.824 | Unknown at this time.                                                                                                                                                      |
| morula                                                  | 1.821 | Ubiquitin protein ligase binding; mitotic anaphase; negative regulation of synaptic growth at neuromuscular junction; regulation of synaptic transmission                  |
| supressor of Ty element 16                              | 1.821 | DNA binding; metalloexopeptidase activity; DNA unwinding during replication; regulation of chromatin assembly or disassembly; proteolysis                                  |
| Cyclin-dependent kinase 8                               | 1.819 | Protein serine/threonine kinase activity; cyclin-dependent protein kinase activity; RNA polymerase II transcription mediator activity; ATP binding                         |
| lethal (1) G0232                                        | 1.818 | Protein tyrosine phosphatase activity; non-membrane spanning protein tyrosine phosphatase activity; transporter activity; rhodopsin-like receptor activity.                |
| Mediator complex subunit 27                             | 1.818 | RNA polymerase II transcription mediator activity; transcription cofactor activity; transcription initiation from RNA polymerase II promoter                               |
| CG12171                                                 | 1.817 | oxidoreductase activity, acting on CH-OH group of donors; binding; metabolic process                                                                                       |
| TBP-associated factor 30kD subunit beta /// Gdi-related | 1.817 | General RNA polymerase II transcription factor activity; DNA binding; transcription initiation from RNA polymerase II promoter; regulation of transcription, DNA-dependent |
| CG3571                                                  | 1.816 | actin binding; protein binding                                                                                                                                             |

|                  |       |                                                                                                                                                                              |
|------------------|-------|------------------------------------------------------------------------------------------------------------------------------------------------------------------------------|
| CG3887           | 1.815 | selenium binding; cell redox homeostasis                                                                                                                                     |
| CG30373          | 1.814 | Unknown at this time.                                                                                                                                                        |
| CG14815          | 1.812 | peroxisome targeting sequence binding                                                                                                                                        |
| CG11447          | 1.809 | rRNA (uridine-2'-O-)-methyltransferase activity; rRNA processing                                                                                                             |
| CG3500           | 1.809 | Unknown at this time.                                                                                                                                                        |
| Rs1              | 1.809 | ATP-dependent RNA helicase activity; RNA helicase activity; ATP binding; nucleic acid binding; ribosome biogenesis and assembly                                              |
| S2P              | 1.809 | Metalloendopeptidase activity; sterol regulatory element-binding protein site 2 protease activity; zinc ion binding; sterol regulatory element binding protein cleavage      |
| CG17385          | 1.807 | zinc ion binding; nucleic acid binding                                                                                                                                       |
| CG8786           | 1.806 | protein binding; zinc ion binding                                                                                                                                            |
| lethal (2) 35Df  | 1.805 | ATP-dependent RNA helicase activity; ATP binding; nucleic acid binding.                                                                                                      |
| CG14881          | 1.804 | oxidoreductase activity; binding; metabolic process                                                                                                                          |
| CG3362           | 1.803 | Unknown at this time.                                                                                                                                                        |
| CG11859          | 1.802 | protein kinase activity; ATP binding; protein serine/threonine kinase activity; amino acid phosphorylation                                                                   |
| CG14881          | 1.802 | oxidoreductase activity; binding; metabolic process                                                                                                                          |
| CG6689           | 1.798 | zinc ion binding; nucleic acid binding                                                                                                                                       |
| tumor-suppressor | 1.796 | Transcription factor activity; sequence-specific DNA binding; negative regulation of transcription from RNA polymerase II promoter; regulation of preblastoderm mitotic cell |
| Grip71           | 1.794 | Gamma-tubulin binding; mitosis; regulation of cell cycle; mitotic spindle organization and biogenesis                                                                        |
| CG6523           | 1.792 | thiol-disulfide exchange intermediate activity; electron carrier activity; protein disulfide oxidoreductase activity; redox homeostasis                                      |

|                                |       |                                                                                                                                                                                                                          |
|--------------------------------|-------|--------------------------------------------------------------------------------------------------------------------------------------------------------------------------------------------------------------------------|
| CG7197                         | 1.792 | GTPase activity; GTP binding' small GTPase mediated signal transduction                                                                                                                                                  |
| Klp10A                         | 1.792 | Motor activity; microtubule motor activity; ATP binding; Mitotic sister chromatid segregation; microtubule-based movement; mitotic anaphase A; mitotic spindle organization                                              |
| Anon-becker2 /// CG6171        | 1.789 | Unknown at this time                                                                                                                                                                                                     |
| TXBP181-like                   | 1.789 | Unknown at this time                                                                                                                                                                                                     |
| CG9977                         | 1.787 | adenosylhomocysteinase activity; binding; one-carbon compound metabolic process                                                                                                                                          |
| Topoisomerase IIIa             | 1.787 | DNA topoisomerase type I activity; DNA topoisomerase activity; zinc ion binding; DNA topological change; DNA modification; DNA unwinding during replication                                                              |
| CG3163                         | 1.786 | Unknown at this time.                                                                                                                                                                                                    |
| CG9839                         | 1.786 | Unknown at this time.                                                                                                                                                                                                    |
| CG13295                        | 1.783 | Unknown at this time.                                                                                                                                                                                                    |
| cathepsin B /// CG10992        | 1.782 | Its molecular function is described as cathepsin B activity. It is involved in the biological processes: autophagic cell death; salivary gland cell autophagic cell death; proteolysis; regulation of catalytic activity |
| CG4042                         | 1.782 | sequence-specific DNA binding; transcription factor activity; regulation of transcription, DNA-dependent                                                                                                                 |
| Mediator complex subunit 10    | 1.78  | RNA polymerase II transcription mediator activity; transcription coactivator activity; transcription from RNA polymerase II promoter; transcription initiator                                                            |
| CG31109                        | 1.777 | zinc ion binding                                                                                                                                                                                                         |
| CG5733                         | 1.776 | Unknown at this time.                                                                                                                                                                                                    |
| ribonucleoprotein La           | 1.774 | 5S rRNA primary transcript binding; RNA polymerase III transcription termination factor activity; mRNA binding; nucleotide binding; RNA processing                                                                       |
| CG3925                         | 1.772 | Unknown at this time.                                                                                                                                                                                                    |
| lethal(2) neighbour of 1(2)tid | 1.772 | Mannosyltransferase activity                                                                                                                                                                                             |

|                                     |       |                                                                                                                                                                                   |
|-------------------------------------|-------|-----------------------------------------------------------------------------------------------------------------------------------------------------------------------------------|
| TBP-associated factor 80            | 1.771 | General RNA polymerase II transcription factor activity; transcription initiation from RNA polymerase II promoter; regulation of transcription, DNA-dependent; positive regulator |
| lethal (1) G0095                    | 1.77  | Binding                                                                                                                                                                           |
| Ogg1                                | 1.77  | Oxidized purine base lesion DNA N-glycosylase activity; DNA-(apurinic or apyrimidinic site) lyase activity; damaged DNA binding; DNA repair; nucleotide-excision repair;          |
| CG7988                              | 1.768 | circadian rhythm                                                                                                                                                                  |
| CG1440                              | 1.767 | cysteine-type endopeptidase activity; proteolysis                                                                                                                                 |
| photolyase                          | 1.767 | DNA (6-4) photolyase activity; DNA repair                                                                                                                                         |
| CG10465                             | 1.762 | protein binding; voltage-gated potassium channel activity; potassium ion transport                                                                                                |
| CG1814                              | 1.762 | Unknown at this time.                                                                                                                                                             |
| CG7011                              | 1.762 | Unknown at this time.                                                                                                                                                             |
| CG7718                              | 1.762 | CDP-diacylglycerol-glycerol-3-phosphate 3-phosphatidyltransferase activity; phospholipid biosynthetic process                                                                     |
| Drosophila homolog of HIRA          | 1.762 | Transcription corepressor activity; chromatin binding; chromatin remodeling; sperm chromatin decondensation; fertilization, exchange of chromosomal proteins                      |
| mitochondrial ribosomal protein L40 | 1.762 | Structural constituent of ribosome. Translation                                                                                                                                   |
| Ciao1                               | 1.761 | Unknown at this time                                                                                                                                                              |
| CAS/CSE1 segregation protein        | 1.76  | Importin-alpha export receptor activity; protein transporter activity; protein import into nucleus; protein export from nucleus; apoptosis; phagocytosis, engulfment              |
| CG11790                             | 1.756 | Unknown at this time.                                                                                                                                                             |
| CG8257                              | 1.754 | cysteine-tRNA ligase activity; ATP binding; cysteinyl-tRNA aminoacylation                                                                                                         |
| CG10466                             | 1.752 | mRNA binding; RNA binding; metallopeptidase activity; zinc ion binding; nucleotide binding; proteolysis                                                                           |

|                              |       |                                                                                                                                                                                                                  |
|------------------------------|-------|------------------------------------------------------------------------------------------------------------------------------------------------------------------------------------------------------------------|
| CG9376                       | 1.749 | GPI anchor biosynthetic process                                                                                                                                                                                  |
| antimeros                    | 1.748 | Kinesin binding                                                                                                                                                                                                  |
| CG12140                      | 1.746 | electron-transferring-flavoprotein dehydrogenase activity oxidative phosphorylation                                                                                                                              |
| CG2246                       | 1.746 | ribose phosphate diphosphokinase activity; magnesium ion binding; nucleotide biosynthetic process; nucleoside metabolic process                                                                                  |
| CG4858                       | 1.746 | nucleotide binding; ATP binding                                                                                                                                                                                  |
| Cyclin-dependent kinase9 2.7 | 1.742 | RNA polymerase subunit kinase activity; cyclin-dependent protein kinase activity; protein serine/threonine kinase activity; positive transcription elongation factor activity;                                   |
| CG11847                      | 1.74  | protein export from nucleus                                                                                                                                                                                      |
| CG7262                       | 1.74  | transport                                                                                                                                                                                                        |
| CG8314                       | 1.74  | zinc ion binding                                                                                                                                                                                                 |
| CG16812                      | 1.739 | Unknown at this time.                                                                                                                                                                                            |
| CHORD containing protein     | 1.739 | Zinc ion binding                                                                                                                                                                                                 |
| mutagen-sensitive 312        | 1.739 | Protein binding; nucleotide-excision repair, DNA damage recognition; meiotic chromosome segregation; meiotic recombination                                                                                       |
| CG12151                      | 1.738 | [pyruvate dehydrogenase (lipoamide)] phosphatase activity; protein serine/threonine phosphatase activity; phosphoprotein phosphatase activity; protein amino acid dephosphorylation; pyruvate metabolic process  |
| CG9140                       | 1.738 | NADH dehydrogenase (ubiquinone) activity; NADH dehydrogenase activity; NAD binding; 4 iron, 4 sulfur cluster binding; FMN binding; electron donor activity; mitochondrial electron transport, NADH to ubiquinone |
| CG13563                      | 1.737 | Unknown at this time.                                                                                                                                                                                            |
| CG10563                      | 1.736 | phagocytosis, engulfment                                                                                                                                                                                         |
| CG11975                      | 1.736 | Unknown at this time.                                                                                                                                                                                            |
| CG14641                      | 1.736 | mRNA binding; zinc ion binding; nucleic acid binding; nucleotide binding; alternative nuclear mRNA splicing, via spliceosome                                                                                     |

|                                                           |       |                                                                                                                                                                             |
|-----------------------------------------------------------|-------|-----------------------------------------------------------------------------------------------------------------------------------------------------------------------------|
| CG7263                                                    | 1.735 | electron carrier activity; FAD binding; DNA fragmentation during apoptosis; induction of apoptosis; cell redox homeostasis                                                  |
| beta4GalNAcTB                                             | 1.731 | Acetylgalactosaminyltransferase activity; N-acetylglucosamine metabolic process. 8 alleles are reported.                                                                    |
| CG4673                                                    | 1.731 | structural constituent of nuclear pore; zinc ion binding                                                                                                                    |
| Rab-protein 4                                             | 1.731 | GTPase activity; GTP binding; endocytosis; small GTPase mediated signal transduction; protein transport.                                                                    |
| zeste-white 5                                             | 1.73  | Transcription factor activity; chromatin insulator sequence binding; protein binding; zinc ion binding                                                                      |
| CG5384                                                    | 1.729 | ubiquitin thiolesterase activity; protein modification process; ubiquitin-dependent protein catabolic process                                                               |
| DNA polymerase interacting tpr containing protein of 47kD | 1.725 | Binding                                                                                                                                                                     |
| CG3040                                                    | 1.724 | protein binding                                                                                                                                                             |
| sec15                                                     | 1.724 | axon guidance; phototaxis; neurotransmitter secretion; synaptic vesicle docking during exocytosis; synaptic vesicle targeting; vesicle-mediated transport                   |
| d-spinophilin                                             | 1.723 | Protein phosphatase 1 binding; protein binding; phosphopantetheine binding; olfactory behavior.                                                                             |
| regulatory subunit A of type 2A protein phosphatase       | 1.721 | Protein phosphatase type 2A regulator activity; protein serine/threonine phosphatase activity; binding; protein amino acid dephosphorylation; phagocytosis, engulfment; mit |
| tiovivo                                                   | 1.718 | Protein phosphatase 1 binding; microtubule motor activity; chromatin binding; plus-end-directed microtubule motor activity; ATP binding; mitotic chromosome condensation    |
| CG4802                                                    | 1.717 | S-methyl-5-thioadenosine phosphorylase activity; phosphorylation                                                                                                            |

|                 |       |                                                                                                                                                                  |
|-----------------|-------|------------------------------------------------------------------------------------------------------------------------------------------------------------------|
| Updo            | 1.717 | Uroporphyrinogen decarboxylase activity; heme biosynthetic process; porphyrin biosynthetic process                                                               |
| CG5933          | 1.712 | mRNA (2'-O-methyladenosine-N6-)-methyltransferase activity; RNA methylation                                                                                      |
| Rrp45           | 1.712 | 3'-5'-exoribonuclease activity; RNA binding; mRNA processing                                                                                                     |
| Spindle-B       | 1.712 | Recombinase activity; ATP binding; DNA binding; DNA-dependent ATPase activity; 14 unique terms, many of which group under: primary metabolic process             |
| zwilch          | 1.712 | Mitosis; mitotic cell cycle spindle assembly checkpoint                                                                                                          |
| CG11696         | 1.708 | zinc ion binding                                                                                                                                                 |
| CG33681         | 1.708 | Unknown at this time.                                                                                                                                            |
| CG13097         | 1.706 | rRNA processing                                                                                                                                                  |
| CG3680          | 1.706 | catalytic activity; transcription factor activity; regulation of transcription, DNA-dependent                                                                    |
| CG7698          | 1.706 | hydrolase activity; mRNA cleavage; mRNA polyadenylation                                                                                                          |
| CG7364          | 1.705 | transporter activity; phagocytosis, engulfment                                                                                                                   |
| ribonuclease H1 | 1.703 | Ribonuclease H activity; magnesium ion binding; nucleic acid binding                                                                                             |
| Hus1-like       | 1.702 | DNA repair.                                                                                                                                                      |
| Sirt4           | 1.702 | NAD-dependent histone deacetylase activity; NAD binding; DNA binding; zinc ion binding; chromatin silencing; protein amino acid deacetylation                    |
| CG3287          | 1.701 | Unknown at this time.                                                                                                                                            |
| CG11866         | 1.7   | Unknown at this time.                                                                                                                                            |
| spindle-G       | 1.7   | Protein binding. 18 unique terms, many of which group under: oocyte axis determination; anterior/posterior axis specification; dorsal/ventral axis specification |
| CG15916         | 1.699 | rRNA processing                                                                                                                                                  |
| CG11695         | 1.698 | zinc ion binding                                                                                                                                                 |
| CG12393         | 1.698 | Unknown at this time.                                                                                                                                            |
| CG32038         | 1.698 | Unknown at this time.                                                                                                                                            |
| DNApol-eta      | 1.698 | DNA-directed DNA polymerase activity; DNA synthesis                                                                                                              |

|                                                   |       |                                                                                                                                                                                                                           |
|---------------------------------------------------|-------|---------------------------------------------------------------------------------------------------------------------------------------------------------------------------------------------------------------------------|
| Spase 18/21-subunit                               | 1.698 | Signal peptidase activity; serine-type peptidase activity; signal peptide processing; proteolysis                                                                                                                         |
| cyclin C                                          | 1.696 | Cyclin-dependent protein kinase regulator activity; RNA polymerase II transcription mediator activity; protein binding. Transcription initiation from RNA polymerase II pro                                               |
| Eukaryotic initiation factor 2alpha               | 1.696 | Translation initiation factor activity; GTP binding; tRNA binding; RNA binding; translational initiation; formation of translation initiation ternary complex; mitotic spin                                               |
| CG7556                                            | 1.695 | unfolded protein binding; DNA binding; heat shock protein binding; protein folding                                                                                                                                        |
| CG3446                                            | 1.692 | Its molecular function is described as NADH dehydrogenase activity; mitochondrial electron transport, NADH to ubiquinone                                                                                                  |
| CG31800                                           | 1.688 | Unknown at this time.                                                                                                                                                                                                     |
| lethal (3) s1921                                  | 1.686 | Deoxyhypusine monooxygenase activity; binding; peptidyl-lysine modification to hypusine                                                                                                                                   |
| CG6672                                            | 1.684 | zinc ion transmembrane transporter activity; cation transport                                                                                                                                                             |
| CG34015                                           | 1.682 | Unknown at this time.                                                                                                                                                                                                     |
| CG4813                                            | 1.681 | protein binding; zinc ion binding                                                                                                                                                                                         |
| Dak1                                              | 1.681 | Cytidylate kinase activity; uridylate kinase activity; ATP binding; nucleobase, nucleoside, nucleotide and nucleic acid metabolic process                                                                                 |
| CG4769                                            | 1.68  | electron transporter, transferring electrons within CoQH2-cytochrome c reductase complex activity; heme binding; iron ion binding; oxidative phosphorylation; mitochondrial electron transport, ubiquinol to cytochrome c |
| Polypeptide N-acetylgalactosaminyltransferase 35A | 1.679 | Polypeptide N-acetylgalactosaminyltransferase activity; Oligosaccharide biosynthetic process; open tracheal system development                                                                                            |



|                                  |       |                                                                                                                                                                           |
|----------------------------------|-------|---------------------------------------------------------------------------------------------------------------------------------------------------------------------------|
| methionine-R-sulfoxide reductase | 1.678 | protein-methionine-R-oxide reductase activity; zinc ion binding; peptide-methionine-(S)-S-oxide reductase activity; peptidyl-methionine modification.                     |
| CG12768                          | 1.677 | Unknown at this time.                                                                                                                                                     |
| mei-217 /// transcript c         | 1.677 | Carboxypeptidase A activity; zinc ion binding; meiotic recombination; proteolysis                                                                                         |
| undefined 1                      | 1.677 | Transcription factor activity                                                                                                                                             |
| CG3608                           | 1.673 | protein kinase activity; ATP binding; protein amino acid phosphorylation                                                                                                  |
| fasciclin I                      | 1.673 | Cell adhesion molecule binding.; neuron recognition; axon guidance; calcium-independent cell-cell adhesion; homophilic cell adhesion; neuron adhesion                     |
| CG6995                           | 1.67  | mRNA binding; nucleic acid binding; nucleotide binding; regulation of alternative nuclear mRNA splicing, via spliceosome                                                  |
| CG9799                           | 1.668 | rRNA processing                                                                                                                                                           |
| Tfb2                             | 1.668 | General RNA polymerase II transcription factor activity; transcription initiation from RNA polymerase II promoter; regulation of transcription, DNA-dependent; DNA repair |
| CG13390                          | 1.664 | GTP binding; hydrolase activity, acting on acid anhydrides, in phosphorus-containing anhydrides                                                                           |
| CG6984                           | 1.663 | enoyl-CoA hydratase activity; metabolic process                                                                                                                           |
| licorne                          | 1.663 | MAP kinase kinase activity; protein kinase activity; protein serine/threonine kinase activity; receptor signaling protein serine/threonine kinase activity; ATP binding.  |
| MICAL-like                       | 1.663 | Actin binding; zinc ion binding                                                                                                                                           |
| ATP-dependent RNA helicase       | 1.661 | ATP-dependent RNA helicase activity; ATP binding; nucleic acid binding; oxidoreductase activity; regulation of alternative nuclear mRNA splicing, via spliceosome         |
| CG8818                           | 1.656 | transferase activity, transferring phosphorus-containing groups                                                                                                           |

|                                  |       |                                                                                                                                                                              |
|----------------------------------|-------|------------------------------------------------------------------------------------------------------------------------------------------------------------------------------|
| Acid phosphatase 1               | 1.655 | Acid phosphatase activity                                                                                                                                                    |
| CG10616                          | 1.654 | Unknown at this time.                                                                                                                                                        |
| CG30349                          | 1.649 | Unknown at this time.                                                                                                                                                        |
| CG18766                          | 1.648 | Unknown at this time.                                                                                                                                                        |
| Mediator complex subunit 9       | 1.648 | Unknown at this time                                                                                                                                                         |
| Downstream of raf1               | 1.647 | IMAP kinase kinase activity; receptor signaling protein serine/threonine kinase activity; MAP kinase activity; ATP binding; protein serine/threonine kinase activity; border |
| Eukaryotic initiation factor 1A  | 1.646 | Translation initiation factor activity; RNA binding; translation; translational initiation; smoothed signaling pathway; phagocytosis, engulfment                             |
| Regena                           | 1.646 | Transcription regulator activity; regulation of transcription                                                                                                                |
| CG17293                          | 1.644 | microtubule severing                                                                                                                                                         |
| Peroxisomal farnesylated protein | 1.643 | Unknown at this time                                                                                                                                                         |
| anonymous fast evolving gene IG5 | 1.639 | Satellite DNA binding; telomere capping                                                                                                                                      |
| CG6066                           | 1.639 | Unknown at this time.                                                                                                                                                        |
| lethal (1) G0156                 | 1.639 | Isocitrate dehydrogenase (NAD+) activity; tricarboxylic acid cycle                                                                                                           |
| CG18853 /// photolyase           | 1.638 | deoxyribodipyrimidine photo-lyase activity; DNA repair                                                                                                                       |
| CG7158                           | 1.638 | Unknown at this time.                                                                                                                                                        |
| Nucleosome assembly protein 1    | 1.638 | Histone binding; nucleosome assembly; regulation of transcription, DNA-dependent                                                                                             |
| CG3415                           | 1.637 | estradiol 17-beta-dehydrogenase activity; binding; cysteine-type endopeptidase activity; proteolysis                                                                         |
| CG5044                           | 1.637 | 3-hydroxyisobutyryl-CoA hydrolase activity; metabolic process                                                                                                                |
| Electron transfer flavoprotein   | 1.634 | Electron carrier activity; FAD binding' Malpighian tubule morphogenesis; ectodermal gut morphogenesis; head involution; morphogenesis of an epithelium; open tracheal system |
| CG18508                          | 1.633 | Unknown at this time.                                                                                                                                                        |
| eukaryotic release factor 3      | 1.632 | Translation release factor activity; translation termination factor activity; GTP binding; GTPase activity; translational termination                                        |

|                                     |       |                                                                                                                                                                           |
|-------------------------------------|-------|---------------------------------------------------------------------------------------------------------------------------------------------------------------------------|
| CG11266                             | 1.629 | mRNA binding; RNA binding; nucleotide binding; regulation of alternative nuclear mRNA splicing, via spliceosome; RNA splicing                                             |
| CG32442                             | 1.628 | Unknown at this time.                                                                                                                                                     |
| CG12219                             | 1.627 | zinc ion binding; nucleic acid binding                                                                                                                                    |
| missing imaginal precursors         | 1.627 | Transcription activator activity; chromatin-mediated maintenance of transcription                                                                                         |
| CG9797                              | 1.625 | zinc ion binding; nucleic acid binding                                                                                                                                    |
| Mediator complex subunit 20         | 1.623 | RNA polymerase II transcription mediator activity; DNA-directed RNA polymerase activity; transcription coactivator activity; transcription initiation from RNA polymerase |
| ENL/AF9-related                     | 1.621 | General RNA polymerase II transcription factor activity; transcription initiation from RNA polymerase II promoter; regulation of transcription, DNA-dependent             |
| bluestreak                          | 1.62  | Regulation of pole plasm oskar mRNA localization; oocyte microtubule cytoskeleton polarization; pole plasm oskar mRNA localization; protein localization                  |
| CG9849                              | 1.617 | muscle cell fate determination                                                                                                                                            |
| Trip1                               | 1.616 | Translation initiation factor activity; translational initiation; translation                                                                                             |
| CG5317                              | 1.612 | structural constituent of ribosome; transcription regulator activity; process translation                                                                                 |
| CG14231                             | 1.611 | zinc ion binding; O-sialoglycoprotein endopeptidase activity; proteolysis                                                                                                 |
| mitochondrial ribosomal protein L22 | 1.61  | Structural constituent of ribosome; translation                                                                                                                           |
| CG5543                              | 1.606 | Unknown at this time.                                                                                                                                                     |
| dynactin, p25 subunit               | 1.605 | Acyltransferase activity; microtubule-based movement                                                                                                                      |
| Tudor-SN                            | 1.605 | Transcription coactivator activity; nuclease activity; nucleic acid binding; RNA interference                                                                             |
| CG17896                             | 1.603 | methylmalonate-semialdehyde dehydrogenase (acylating) activity; pyrimidine base metabolic process; valine metabolic process                                               |

|                           |       |                                                                                                                                                                                                                                                                                           |
|---------------------------|-------|-------------------------------------------------------------------------------------------------------------------------------------------------------------------------------------------------------------------------------------------------------------------------------------------|
| CG5131                    | 1.596 | KU70 binding; metallopeptidase activity; zinc ion binding; proteolysis                                                                                                                                                                                                                    |
| Noa36                     | 1.588 | Metal ion binding; zinc ion binding                                                                                                                                                                                                                                                       |
| CG4140                    | 1.587 | Unknown at this time.                                                                                                                                                                                                                                                                     |
| CG18041                   | 1.585 | magnesium ion binding; inorganic diphosphatase activity; phosphate metabolic process                                                                                                                                                                                                      |
| CG3548                    | 1.584 | Unknown at this time.                                                                                                                                                                                                                                                                     |
| rhomboid-7                | 1.579 | Mitochondrial fusion                                                                                                                                                                                                                                                                      |
| TH1                       | 1.579 | mRNA binding; negative regulation of transcription from RNA polymerase II promoter, mitotic                                                                                                                                                                                               |
| Int6 homologue            | 1.578 | Translation initiation factor activity; translational initiation; phagocytosis, engulfment.                                                                                                                                                                                               |
| CG2056                    | 1.577 | trypsin activity; ATP binding; serine-type endopeptidase activity; protein kinase activity; proteolysis; innate immune response; defense response to Gram-positive bacterium; defense response to Gram-negative bacterium; defense response to fungus; protein amino acid phosphorylation |
| salvador/shar-pei         | 1.574 | Protein binding; 13 unique terms, many of which group under: regulation of biological process; anatomical structure development; programmed cell death                                                                                                                                    |
| Yippee                    | 1.574 | Zinc ion binding; metal ion binding                                                                                                                                                                                                                                                       |
| CG10306                   | 1.572 | translation initiation factor activity; ribosome binding; translational initiation; regulation of translational initiation                                                                                                                                                                |
| CG9393                    | 1.558 | P-P-bond-hydrolysis-driven transmembrane transporter activity; protein targeting to mitochondrion; mitochondrial transport; protein transport                                                                                                                                             |
| Kisir                     | 1.556 | Larval behavior; larval locomotory behavior; spermatogenesis; peristalsis                                                                                                                                                                                                                 |
| heat shock protein 60 kDa | 1.555 | Unfolded protein binding; ATP binding; response to heat; protein folding; protein refolding; response to stress; 'de novo' protein folding; protein targeting to mitochondria                                                                                                             |

|                                  |       |                                                                  |
|----------------------------------|-------|------------------------------------------------------------------|
| CG30424                          | 1.544 | Unknown at this time.                                            |
| CG10585                          | 1.531 | trans-hexaprenyltranstransferase activity                        |
| CG13550                          | 1.53  | calcium ion binding; mitotic spindle organization and biogenesis |
| SAM methionine methyltransferase | 1.525 | Unknown at this time                                             |

<sup>1</sup> **Flybase descriptions (43)**
